# Supplementary material for: TFF1 Induces Aggregation and Reduces Motility of Helicobacter pylori
Source: PubMed Central journal article supplement (PMC7918695; doi:10.3390/ijms22041851), 2021-02-12
Supplement: ijms-22-01851-s001.pdf [file ijms-22-01851-s001.pdf]

# TFF1 induces aggregation and reduces motility of *Helicobacter pylori*

Daniela Eletto <sup>1#</sup>, Megi Vllahu <sup>1#</sup>, Fatima Mentucci <sup>1,2</sup>, Pasquale Del Gaudio <sup>1</sup>, Antonello Petrella <sup>1</sup>, Amalia Porta<sup>1,\*</sup> and Alessandra Tosco <sup>1,\*</sup>

<sup>1</sup> Department of Pharmacy, University of Salerno, Fisciano (SA), Italy

<sup>2</sup> PhD Program in Drug Discovery and Development, University of Salerno, Fisciano (SA), Italy

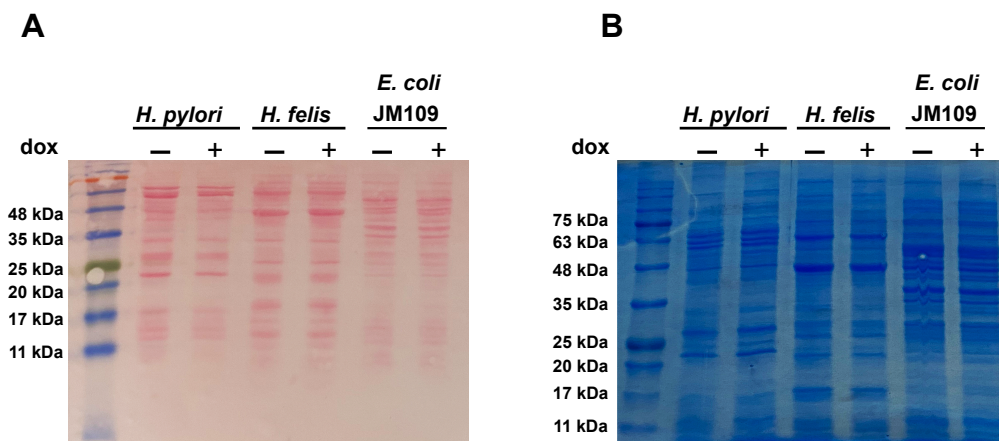

**Supplementary Figure 1.** Loading control. (A) Ponceau Red staining of the Western blot membrane of Fig. 1A. (B) Coomassie blue staining of the same samples of panel A loaded on a 12 % SDS-PAGE

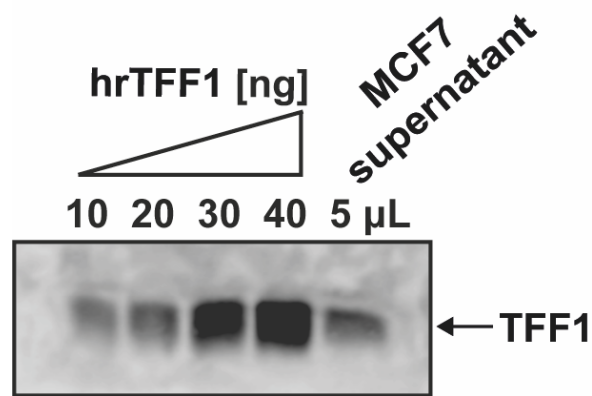

**Supplementary Figure 2.** TFF1 quantitation in MCF7 supernatant. Western blot analysis of different quantities of hrTFF1 and 5  $\mu$ L of MCF7 supernatant.

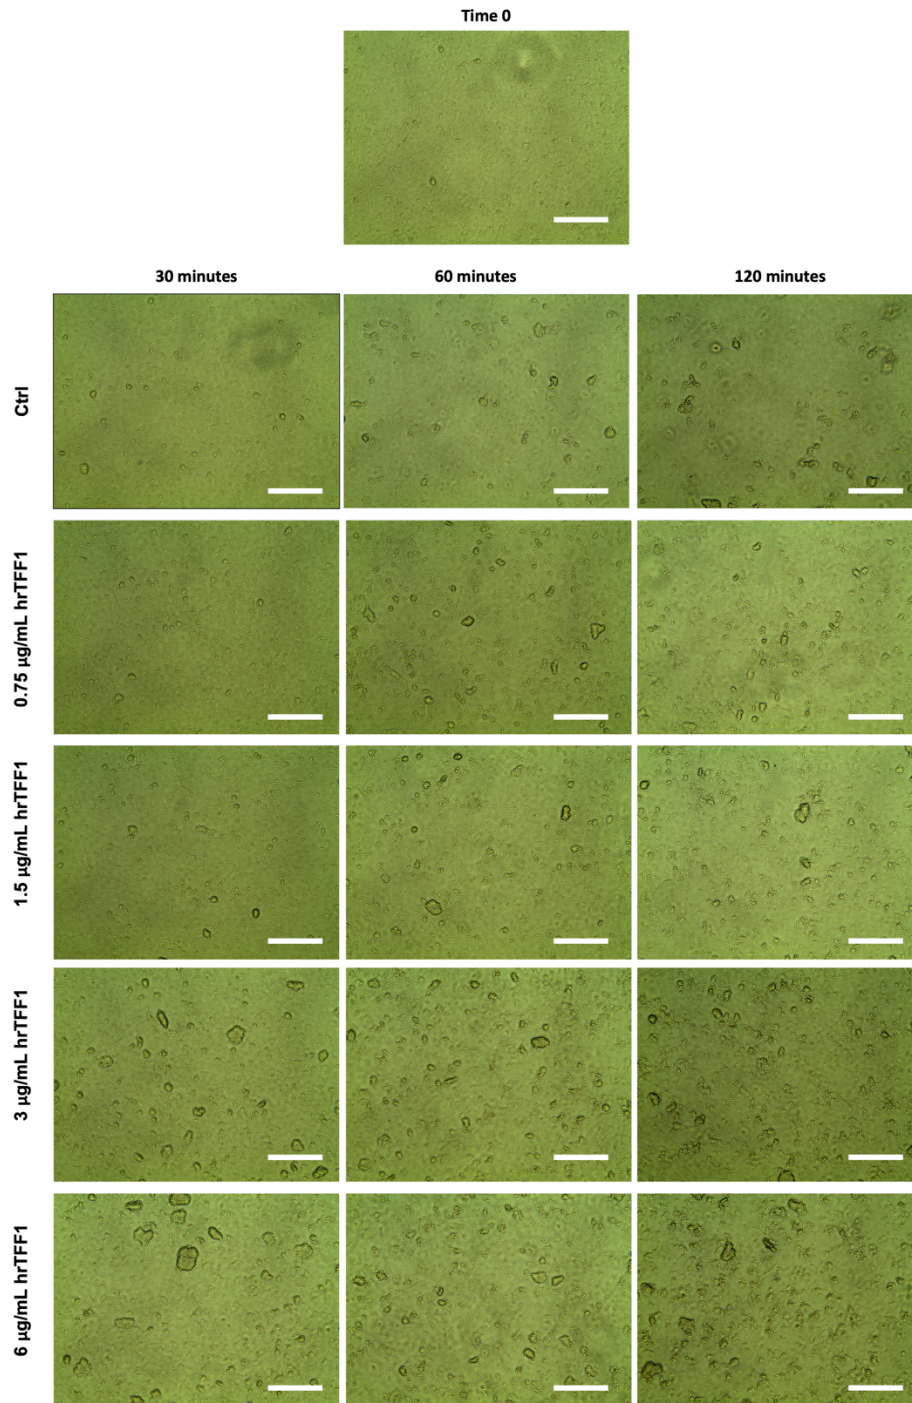

**Supplementary Figure 3.** hrTFF1 induces formation of *H. pylori* aggregates in time and concentration dependent manner. Optical images of *H. pylori* incubated with different concentrations of hrTFF1 (0, 0.75, 1.5, 3, 6  $\mu\text{g/mL}$ ) for different times (0, 30, 60, 120 minutes) . Scale bar 150  $\mu\text{m}$ .

**A**

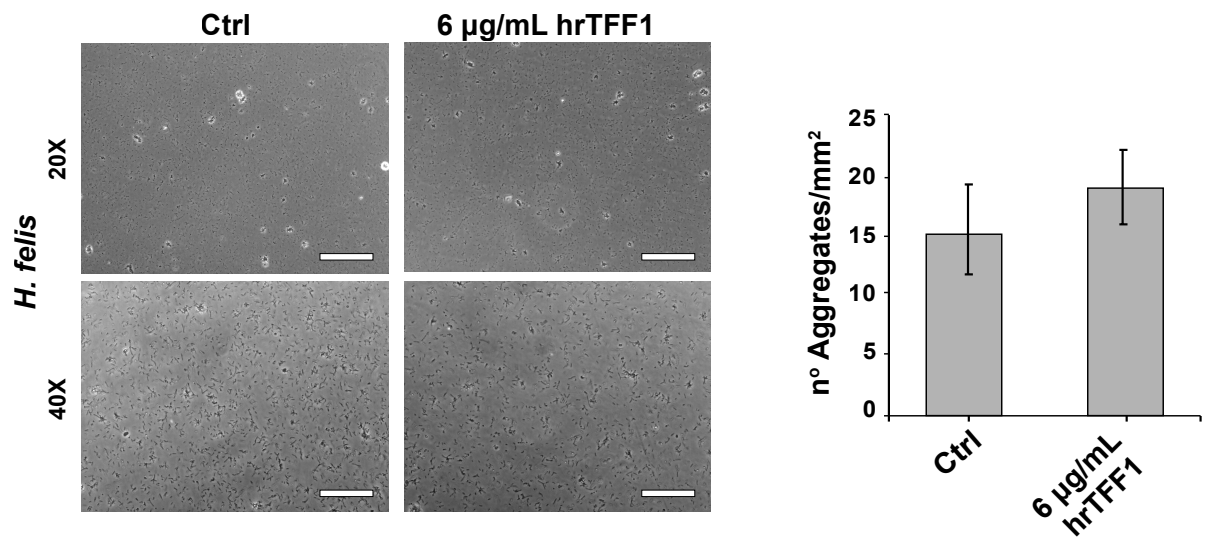

**Supplementary Figure 4.** hrTFF1 does not induce formation of *H. felis* aggregates. Optical images of *H. felis* incubated with 6 µg/mL of hrTFF1 for 4 h. both at 20X magnification (scale bar 150 µm) and at 40X magnification (scale bar 50 µm). Right panel reports the histograms quantitation of bacterial aggregates.

| Gene          | Sequence                           |
|---------------|------------------------------------|
| <i>flaA</i>   | Fw 5'-CGGGCAAGCGTTATTGTCTG-3'      |
|               | Rv 5'-GCGATACGAACCTGACCGAT-3'      |
| <i>flaB</i>   | Fw 5'-ATTCGCAACGCTAATGACGC-3'      |
|               | Rv 5'-GGCTTGAACGGCTTTGGTTT-3'      |
| <i>flgE</i>   | Fw 5'-GCAGAAAACAGCACGCTTGA-3'      |
|               | Rv 5'-ATCGCATTTTTTCGCCGCTAC-3'     |
| <i>virB11</i> | Fw 5'-TTAGGCGAAATTGACACGCA-3'      |
|               | Rv 5'-ATCATTCCGCTATGCCCAGT-3'      |
| <i>alpA</i>   | Fw 5'-ACTACGGCACGAACACCAAT-3'      |
|               | Rv 5'-GACCATCTGAACCAGTCGCA-3'      |
| <i>alpB</i>   | Fw 5'-CAATAACCAAGCGGGTGGGA-3'      |
|               | Rv 5'-TAAAGCGGCGTCCAAAAACG-3'      |
| <i>hopZ</i>   | Fw 5'-TGGGGCTGTGGAATGTCATC-3'      |
|               | Rv 5'-ATACTCGTGGAATGCGACCC-3'      |
| <i>ureA</i>   | Fw 5'-AGACATCACTATCAACGAAGGC-3'    |
|               | Rv 5'-TTTCTTCGCCAGGCTCAAAC-3'      |
| <i>vacA</i>   | Fw 5'-TGGATAGTGC GACTGGGTTT3'      |
|               | Rv 5'-GGCGCTCTTTGAATTGCTCT-3'      |
| <i>cagI</i>   | Fw 5'-CGGTGCTATGGGGATTGTTG-3'      |
|               | Rv 5'-GCTTCAGTTGGTTCGTTGGTAA-3'    |
| <i>cagA</i>   | Fw 5'-AGAGCCTACTGGTGGGGATT-3'      |
|               | Rv 5'-AGCCTTGTATGTCCGGTGGTG-3'     |
| <i>cag25</i>  | Fw 5'-CAAGAATCACTGACAGCTACAAGAA-3' |
|               | Rv 5'-TTTGACCCCTAAAGCGCAAC-3'      |
| 16S           | Fw 5'-ACGCATAGGTCATGTGCCTC-3'      |
|               | Rv 5'-GTGTCCGTTACCCCTCTCAG-3'      |

**Supplementary Table 1.** Real-Time PCR primers
